# Supplementary material for: Evaluation of heavy metals and metabolites in the urine of patients with breast cancer
Source: PubMed Central journal article supplement — Oncol Lett. 2019 Dec 11;19(2):1331–7. doi: 10.3892/ol.2019.11206 (PMC6956222; doi:10.3892/ol.2019.11206), 2019-12-11
Supplement: Supplementary_Data.pdf [file Supplementary_Data.pdf]

Table SI. Baseline characteristics of the study population.

| Characteristics                           | Patients with breast cancer (n=106) | Control group (n=38) |
|-------------------------------------------|-------------------------------------|----------------------|
| Age, mean $\pm$ SEM (years)               | 50.56 $\pm$ 9.79                    | 50.12 $\pm$ 9.98     |
| BMI,                                      |                                     |                      |
| Mean $\pm$ SEM, kg/m <sup>2</sup>         | 24.45 $\pm$ 3.56                    | 24.32 $\pm$ 3.57     |
| Normal (18.5 $\leq$ BMI $\leq$ 25), n (%) | 68 (63.81)                          | 25 (71.42)           |
| Preobese (25 $\leq$ BMI $\leq$ 30) n (%)  | 37 (35.24)                          | 10 (28.58)           |
| Obesity (BMI $\geq$ 30) n (%)             | 1 (1.00)                            | 0 (0.00)             |
| Stage n (%)                               |                                     |                      |
| I                                         | 64 (61.90)                          |                      |
| II                                        | 42 (38.10)                          |                      |

BMI, body mass index; SD, standard deviation.
